# Supplementary material
Source: PubMed Central journal article supplement (PMC2947218)
Supplement: JCI41782sd.pdf [file JCI41782sd.pdf]

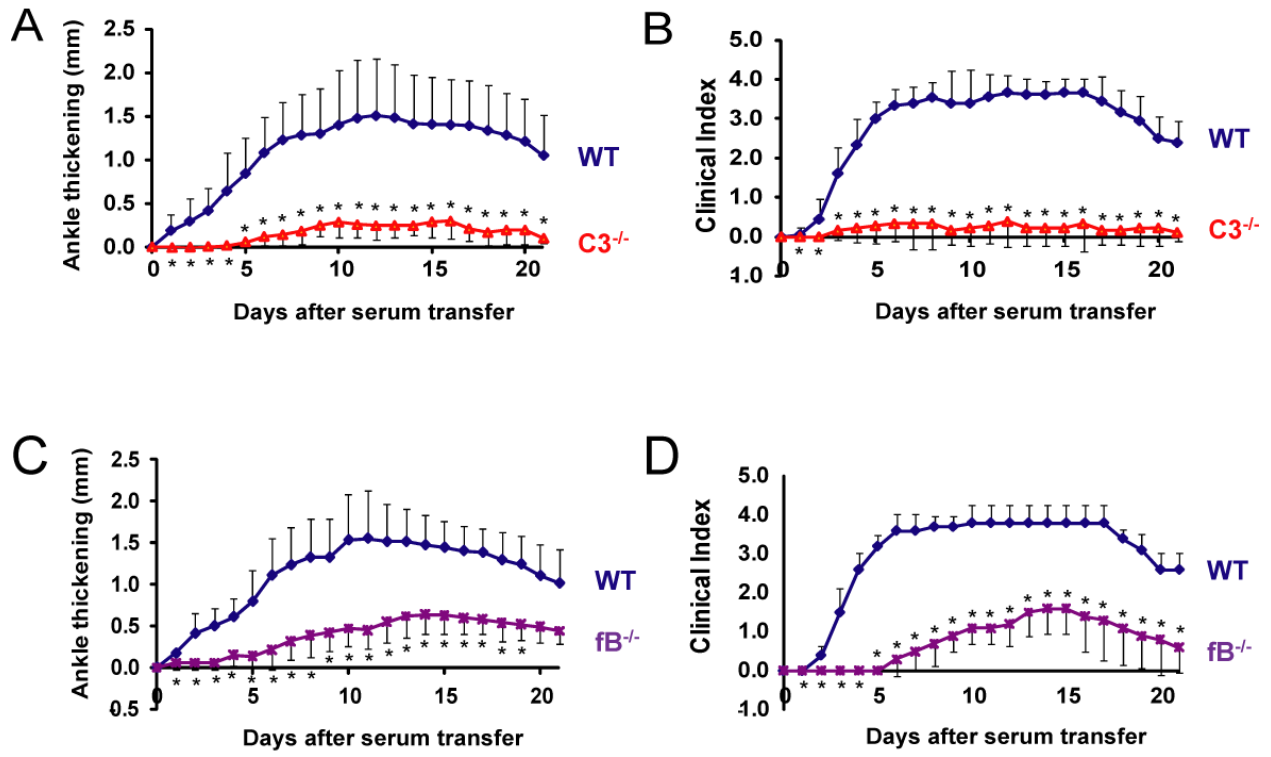

Supplemental Fig 1

## Supplemental Fig 1

### Arthritis induction by adoptive transfer of K/BxN mouse serum and confirmation of

involvement of the AP complement. (A), (B) K/BxN mouse serum induced arthritis in WT and C3<sup>-/-</sup> mice as assessed by ankle thickening (A) or clinical index (B) (n=9 mice per group). (C), (D) K/BxN mouse serum induced arthritis in WT and fB<sup>-/-</sup> mice as assessed by ankle thickening (C) or clinical index (D) (n=5 mice per group). \* P<0.05, non-parametric Wilcoxon/Kruskal-Wallis test.

**A**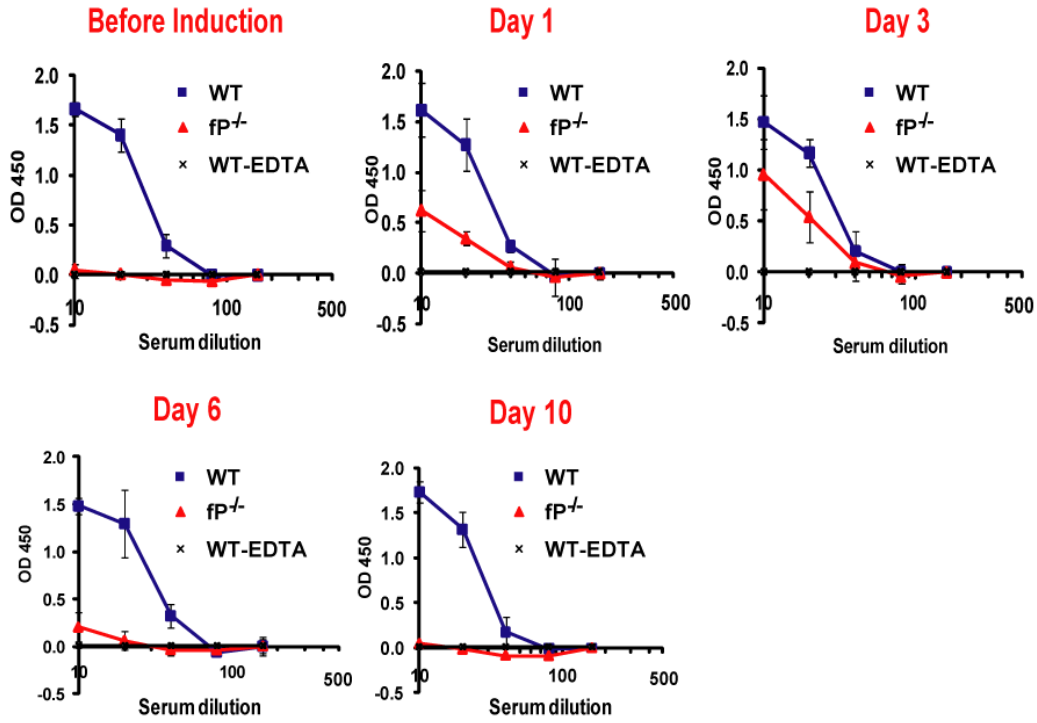**B**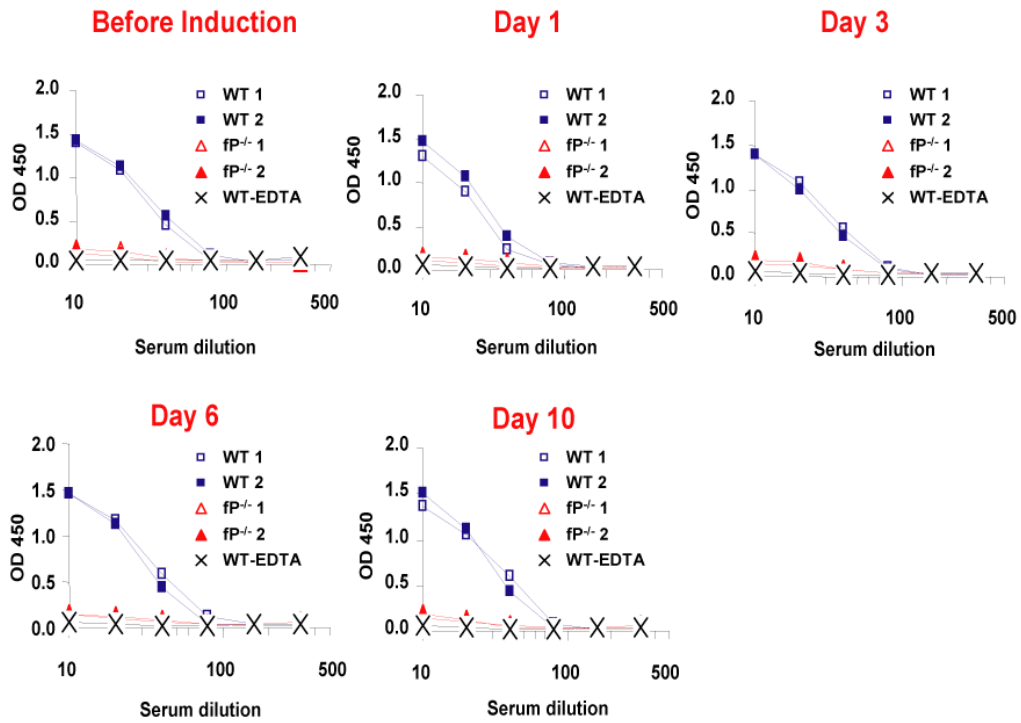

Supplemental Fig 2

## Supplemental Fig 2

### **Adoptive transfer of K/BxN mouser serum but not IgGs transiently and partially restored**

#### **AP complement activity to fP<sup>-/-</sup> mice. (A)** LPS-induced AP complement activity in the sera of

WT and fP<sup>-/-</sup> mice receiving K/BxN mouse serum (n=3 mice per group). **(B)** LPS-induced AP

complement activity in the sera of WT and fP<sup>-/-</sup> mice receiving K/BxN mouse IgG (n=3 for WT,

n=6 for fP<sup>-/-</sup>, data from two representative mice in each group are shown). EDTA-treated WT

mouse serum was used as a control. fP<sup>-/-</sup> mice received K/BxN mouse serum or IgG on day 0 and

2.

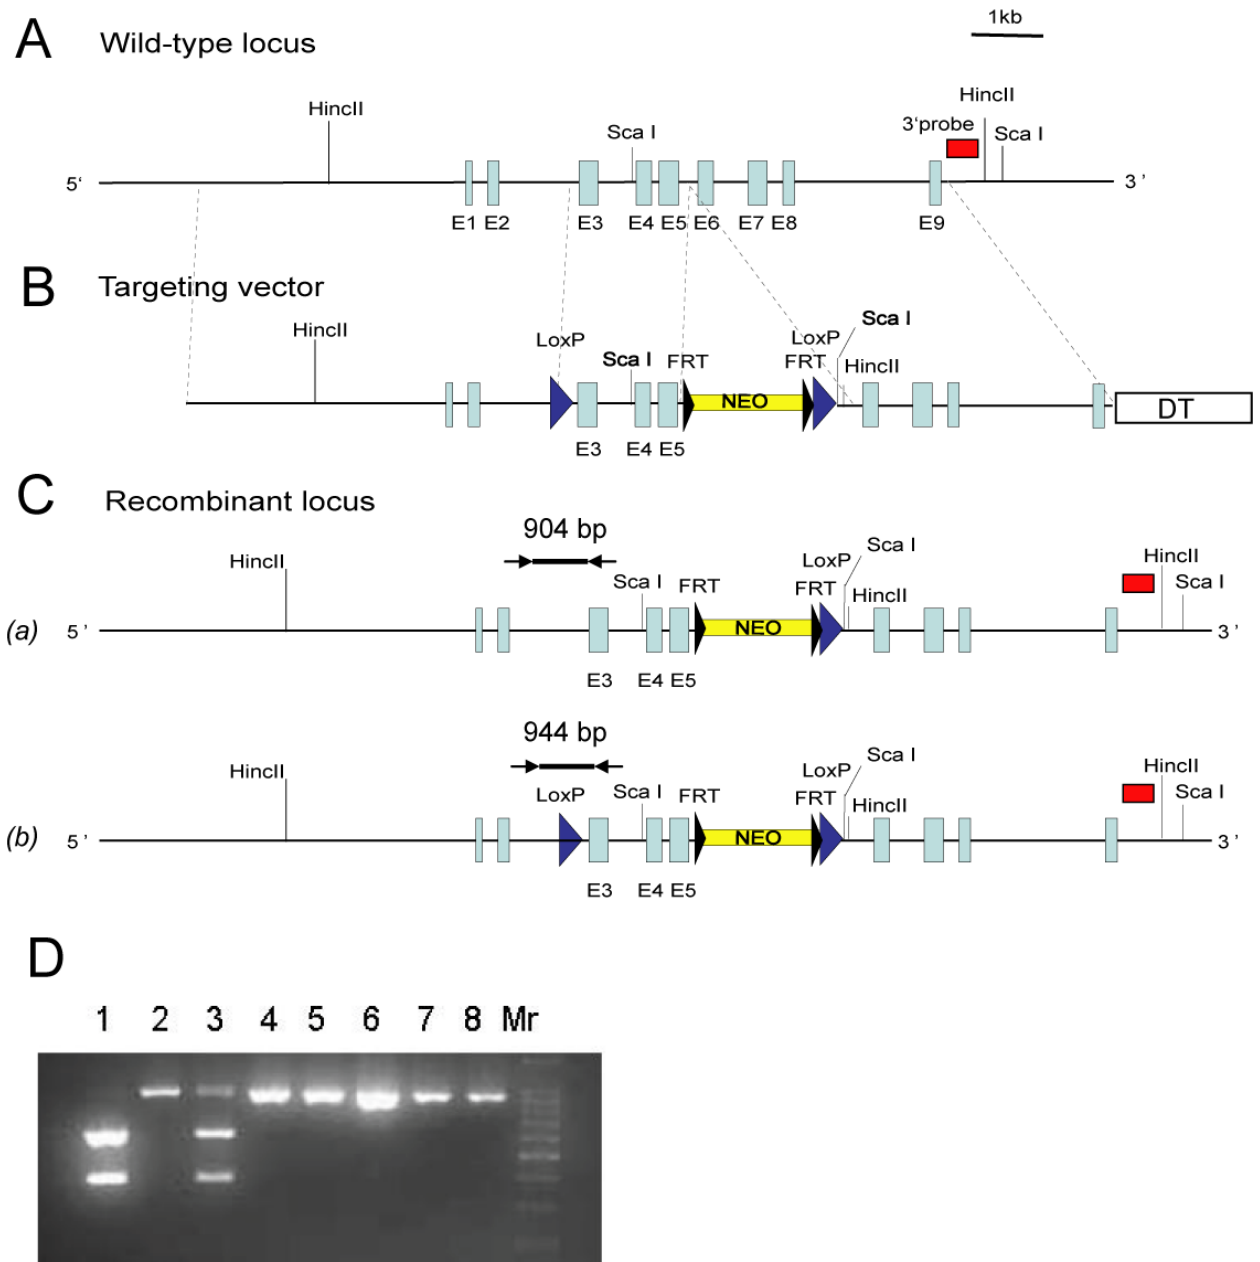

Supplemental Fig 3

### Supplemental Fig 3

**Gene targeting strategy to create a floxed mouse properdin gene.** (A) Genomic structure of the WT mouse properdin gene which is composed of 9 exons (E1 to E9). (B) Structure of the targeting vector. DT: diphtheria toxin; NEO: neomycin. (C) Two potential homologous recombination outcomes that were found in positive ES cell clones identified by Southern blot using a 3' probe (red rectangle). In type (a), the 5' LoxP site was not incorporated into the recombinant locus and such ES cell clones were not desirable. In type (b), the 5' LoxP was present and exons 3-5 of the properdin gene were therefore flanked by two LoxP sites as intended. (D). Screening of type (b) recombination by restriction enzyme (EcoR V) digestion of PCR products using primers spanning the expected 5' LoxP site. Since an EcoR V restriction enzyme site was added to the 5' LoxP sequence, the presence of the 5' LoxP site in a given ES cell clone would be indicated by EcoR V digestion of the PCR product (lane 3). EcoR V-resistant PCR products (lanes 2, 4, 5, 6, 7, 8), on the other hand, indicate ES cell clones lacking the 5' LoxP site. Mr: molecular weight markers.

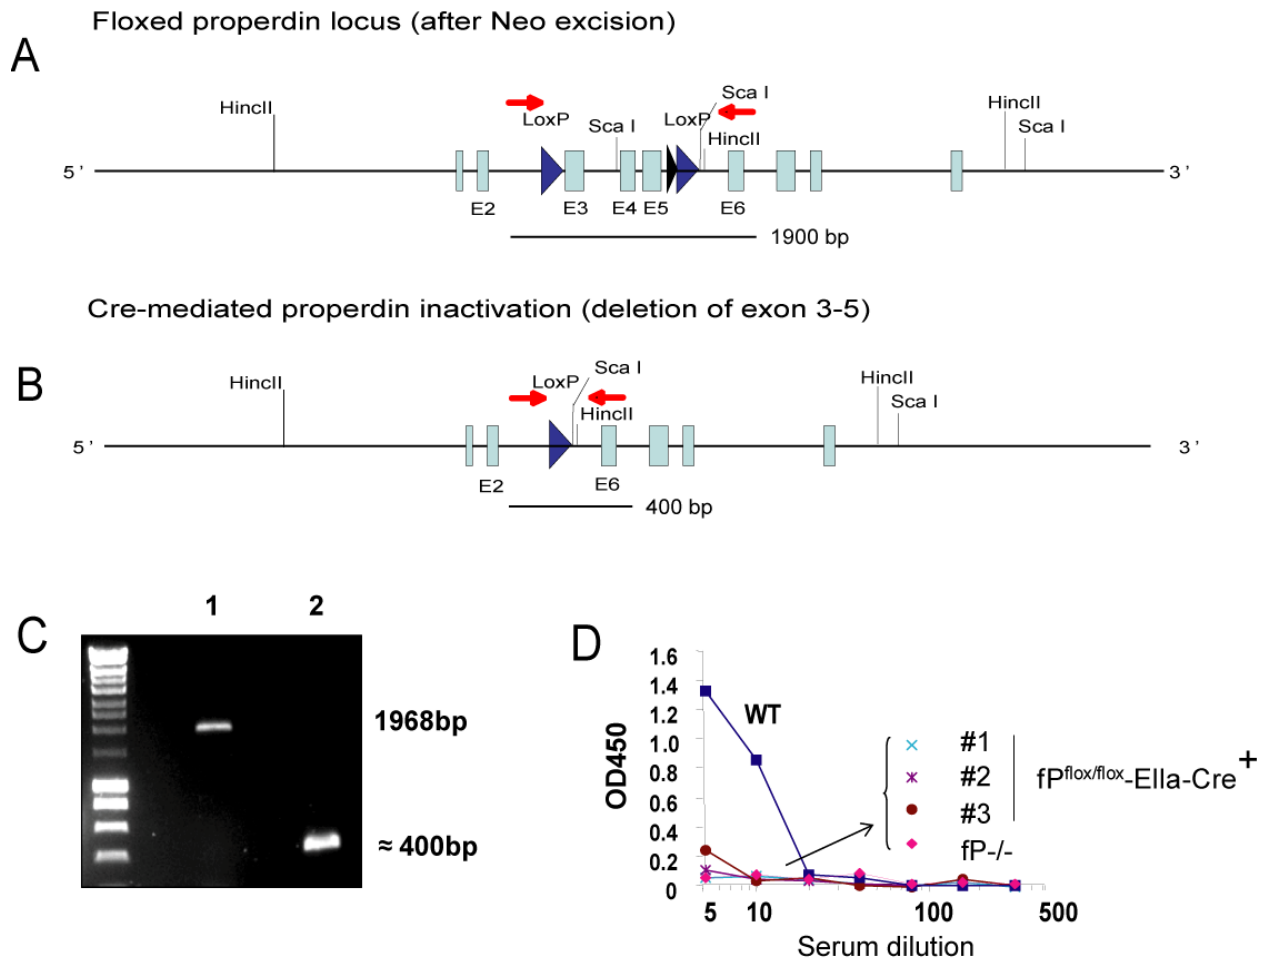

Supplemental Fig 4

## Supplemental Figure 4

**Generation and validation of a properdin-floxed mouse by gene targeting.** (A) Schematic diagram showing the floxed properdin gene structure after NEO excision via breeding with a FLPe transgenic mouse. Exons (E) 3-5 were flanked by two LoxP sites (big arrow heads). A residual FRT site (small arrow head) 3' to exon 5 remained after NEO deletion. Red arrows indicate the direction and approximate location of primers used for genotyping. (B) Schematic diagram showing the mutated properdin gene after Cre-mediated deletion of exons 3-5. (C) PCR analysis of tail DNA from  $fP^{\text{floxed/floxed}}\text{-Ella-Cre}^-$  (lane 1) and  $fP^{\text{floxed/floxed}}\text{-Ella-Cre}^+$  mice (lane 2) showing the presence (1968 bp product) and absence ( $\approx 400$  bp product) of exons 3-5, respectively. The location and direction of primers used are indicated by red arrows in panel A and B. (D) ELISA plate assay showing the lack of LPS-induced AP complement activity in the sera of 3  $fP^{\text{floxed/floxed}}\text{-Ella-Cre}^+$  mice. WT and  $fP^{-/-}$  mouse serum was used as a positive and negative control, respectively.
